# Supplementary material for: Fabrication of a PVDF membrane with tailored morphology and properties via exploring and computing its ternary phase diagram for wastewater treatment and gas separation applications
Source: Royal Society of Chemistry journal article supplement (doi:10.1039/d0ra07592b), 2020-01-01
Supplement: d0ra07592b1.pdf [file d0ra07592b1.pdf]

1 **Supporting information**

2

3 **Fabrication of PVDF membrane with tailored morphology and properties *via***  
4 **exploring and computing its ternary phase diagram for wastewater treatment and**  
5 **gas separation application**

6

7 S. Ashtiani <sup>a\*</sup>, M. Khoshnamvand <sup>c</sup>, P. Číhal <sup>a</sup>, M. Dendisová <sup>a</sup>, A. Randová <sup>a</sup>, D. Bouša <sup>b</sup> A. Shaliutina-  
8 Kolečová <sup>d</sup>, Z. Sofer <sup>b</sup>, K Friess <sup>a\*</sup>

9

10 <sup>a</sup> Department of Physical Chemistry, University of Chemistry and Technology, Prague, Technická 5,  
11 16628 Prague 6, Czech Republic

12 <sup>b</sup> Department of Inorganic Chemistry, University of Chemistry and Technology, Prague, Technická 5,  
13 16628 Prague 6, Czech Republic

14 <sup>c</sup> State Key Laboratory of Environmental Chemistry and Ecotoxicology, Research Center for Eco-  
15 Environmental Sciences, Chinese Academy of Sciences, Beijing 100085, China, University of Chinese  
16 Academy of Sciences, Beijing 100049, China

17 <sup>d</sup> University of South Bohemia in České Budějovice, Faculty of Fisheries and Protection of Waters,  
18 South Bohemian Research Center of Aquaculture and Biodiversity of Hydrocenoses, Research Institute  
19 of Fish Culture and Hydrobiology, Zátíší 728/II, 389 25 Vodňany, Czech Republic

20

21 \* Corresponding authors:

22 E-mail address: jamalias@vscht.cz (S. Ashtiani); karel.friess@vscht.cz (K. Friess).

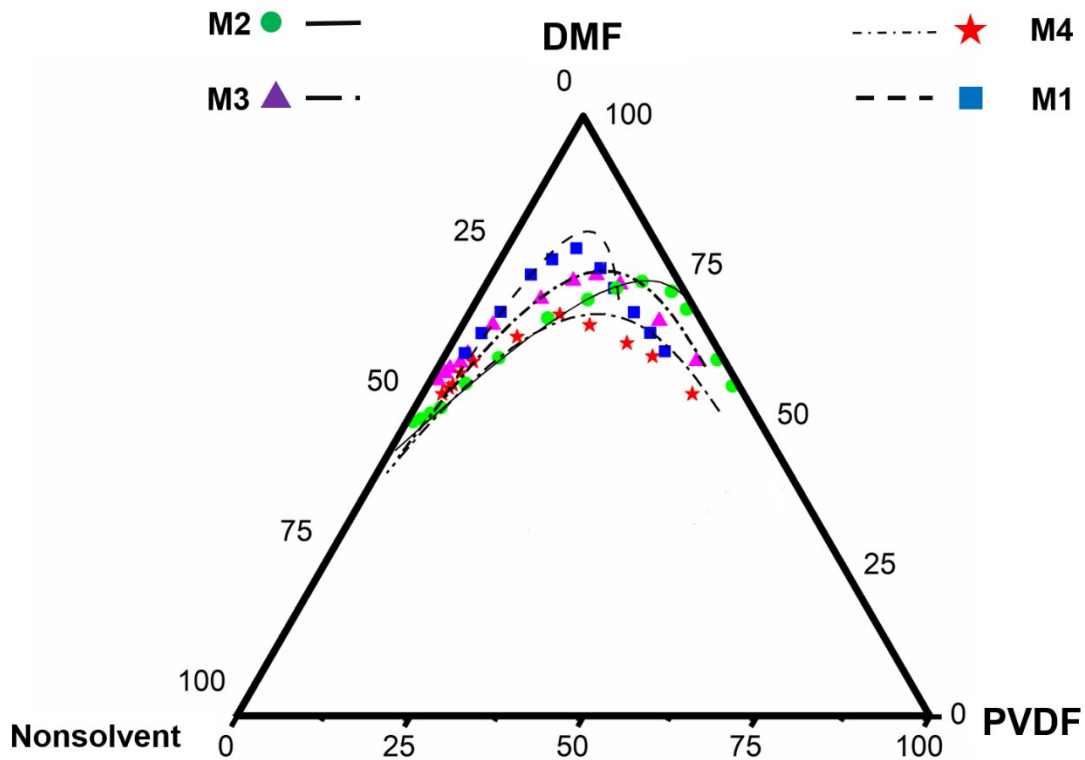

23

24 **Fig. S1** Theoretical cloud points curves calculated based on interaction parameters for M1–M4.

25

26 **Table S1** Calculated binary interactions between solvents, nonsolvent(s) and the polymer with different

27 four methods.

|            | $x_{13}(A)$ | $x_{23}(A)$ | $x_{13}(B)$ | $x_{23}(B)$ | $x_{13}(C)$ | $x_{23}(C)$ | $x_{23}(D)$ | $x_{23}(D)$ |
|------------|-------------|-------------|-------------|-------------|-------------|-------------|-------------|-------------|
| <b>M 1</b> | 0.042238    | 0.088199    | 0.382238    | 0.428199    | 0.261404    | 0.016563    | 0.156843    | 0.009938    |
| <b>M 2</b> | 4.481748    | 0.088199    | 4.821748    | 0.428199    | 0.101497    | 0.016563    | 0.060899    | 0.009938    |
| <b>M 3</b> | 4.549688    | 0.088199    | 4.889688    | 0.428199    | 0.119920    | 0.016563    | 0.071952    | 0.009938    |
| <b>M 4</b> | 0.002823    | 0.088199    | 0.342823    | 0.428199    | 0.438337    | 0.016563    | 0.263002    | 0.009938    |

28

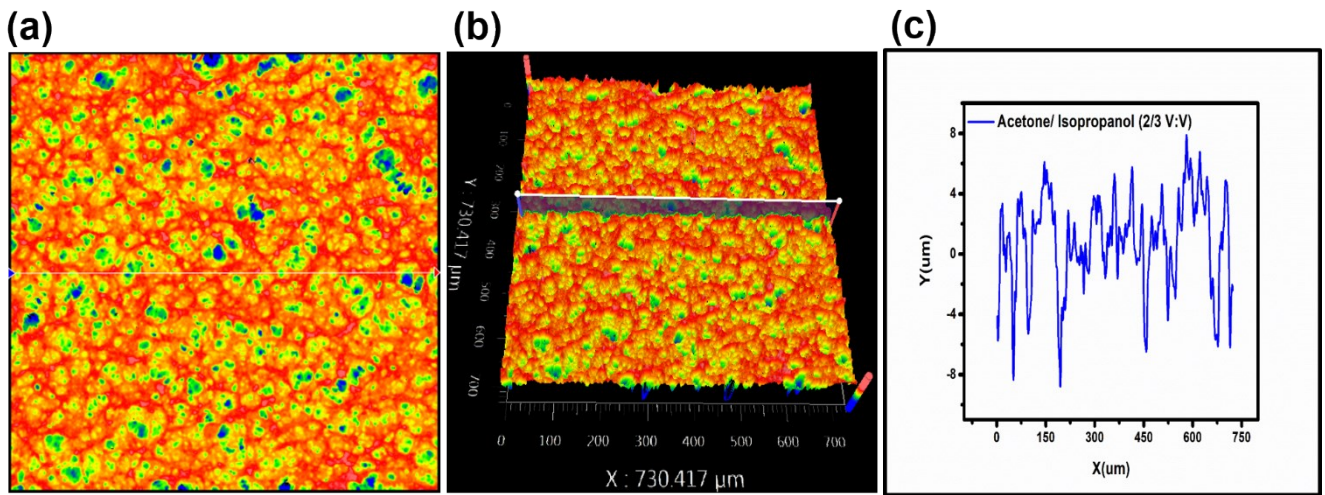

29

30 **Fig. S2** Optical profiler topography 2D (a) and 3D (b) images with the linear profile of the respective  
 31 section graph (c) which demonstrating the patterning of PVDF membrane (M1) fabricated with the  
 32 optimum quantity of solvent, polymer and nonsolvent driven by its ternary phase diagram via the NIPS  
 33 method by using DMF and acetone/isopropanol (2/3 V:V) as the solvent and nonsolvent respectively.

34

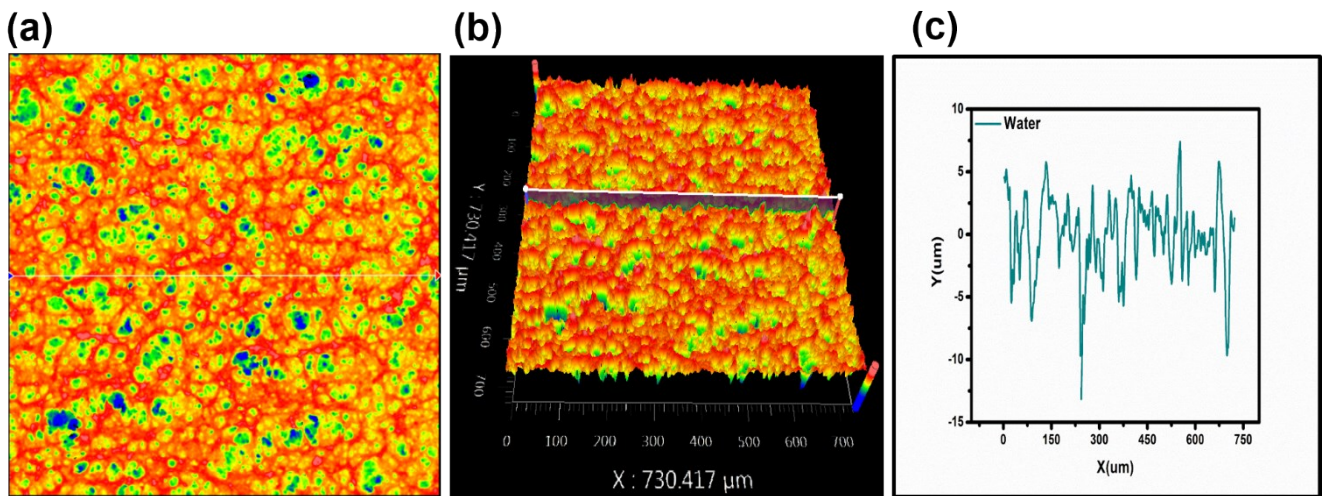

35

36 **Fig. S3** Optical profiler topography 2D (a) and 3D (b) images with the linear profiles of the respective  
 37 section graphs (c) which demonstrating the patterning of PVDF membrane (M2) fabricated with the  
 38 optimum amounts of solvent, polymer and nonsolvent driven by its ternary phase diagram via the NIPS  
 39 method by using DMF and water as the solvent and nonsolvent respectively.

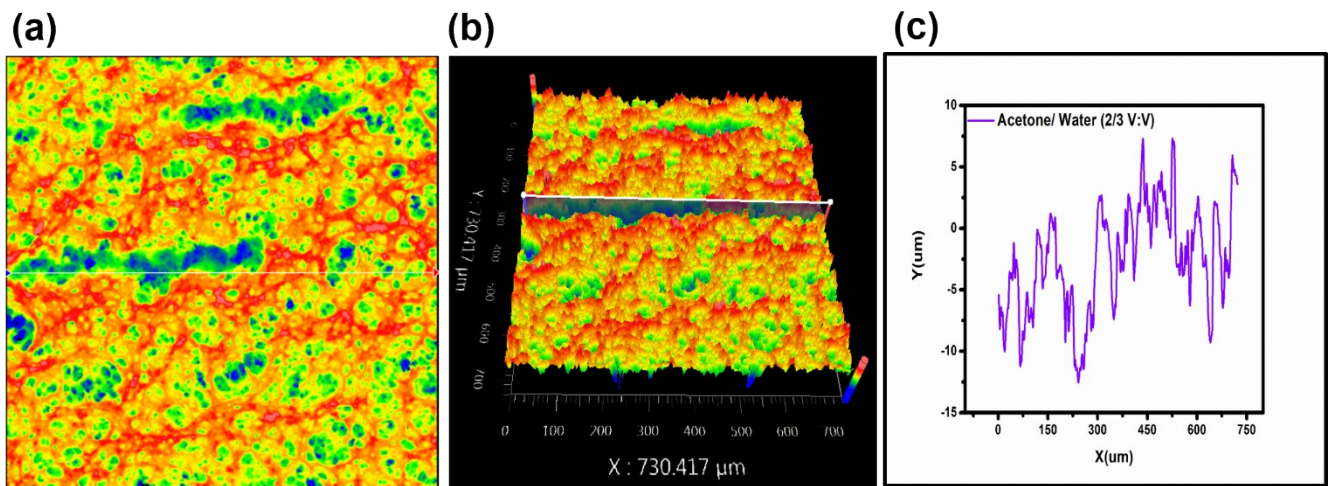

40

41 **Fig. S4** Optical profiler topography 2D (a) and 3D (b) images with the linear profiles of the respective  
 42 section graphs (c) which demonstrating the patterning of PVDF membrane (M3) fabricated with the  
 43 optimum amounts of solvent, polymer and nonsolvent driven by its ternary phase diagram via the NIPS  
 44 method by using DMF and acetone/water (2/3 V:V) as the solvent and nonsolvent respectively.

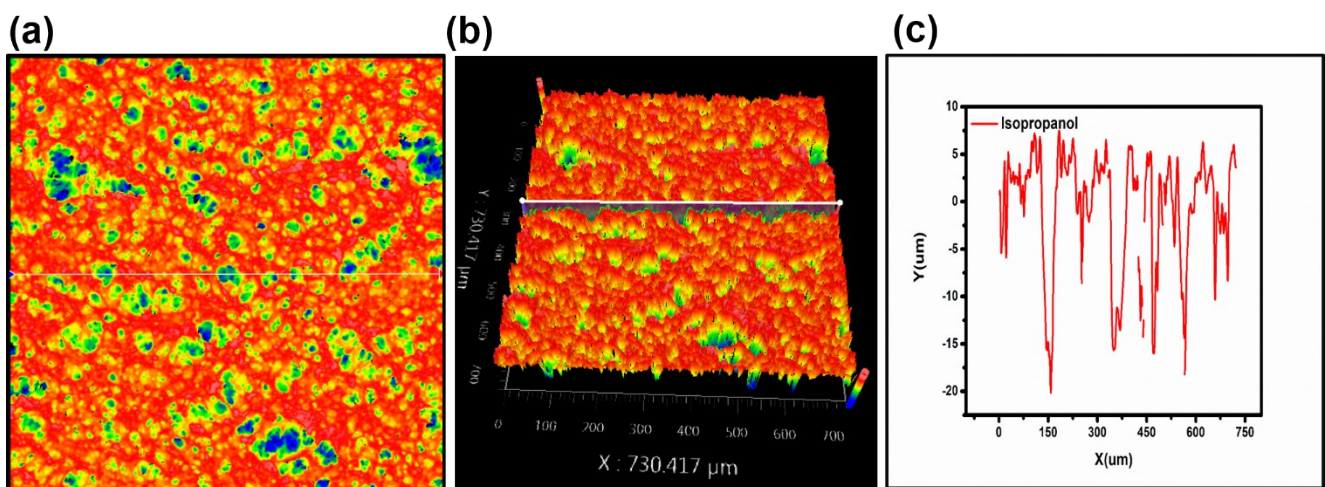

45

46

47 **Fig. S5** Optical profiler topography 2D (a) and 3D (b) images with the linear profiles of the respective  
 48 section graphs (c) which demonstrating the patterning of PVDF membrane (M4) fabricated with the  
 49 optimum amounts of solvent, polymer and nonsolvent driven by its ternary phase diagram via the NIPS  
 50 method by using DMF and isopropanol as the solvent and nonsolvent respectively.

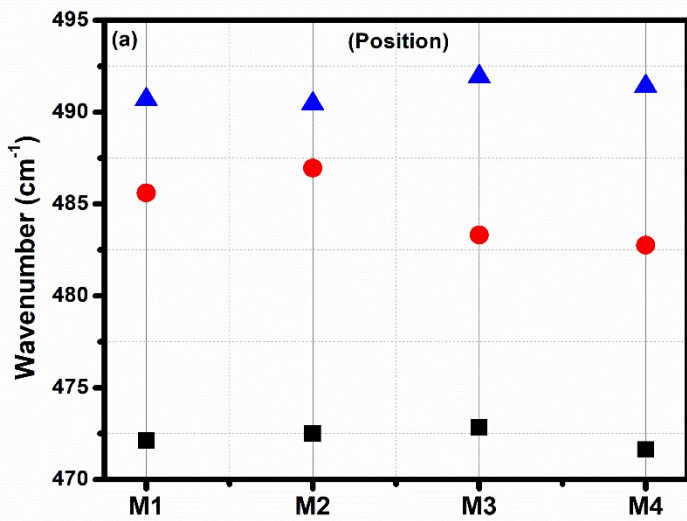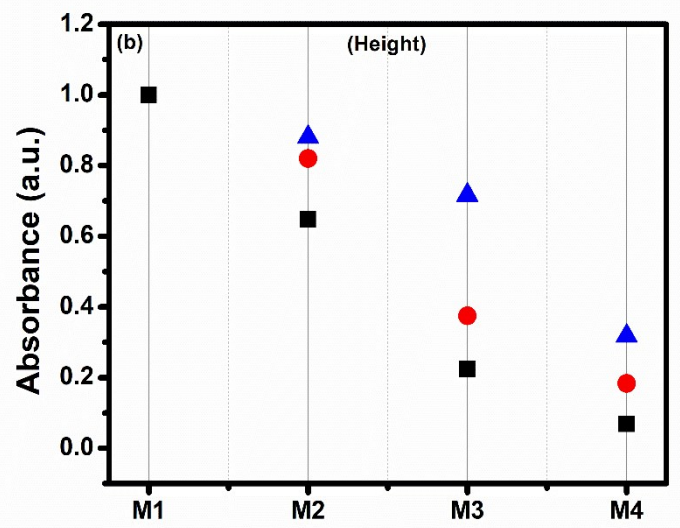

51

52 **Fig. S6** Fitting peaks analysis. Position of bands of the samples (a), the intensity of bands of the samples  
 53 (b).

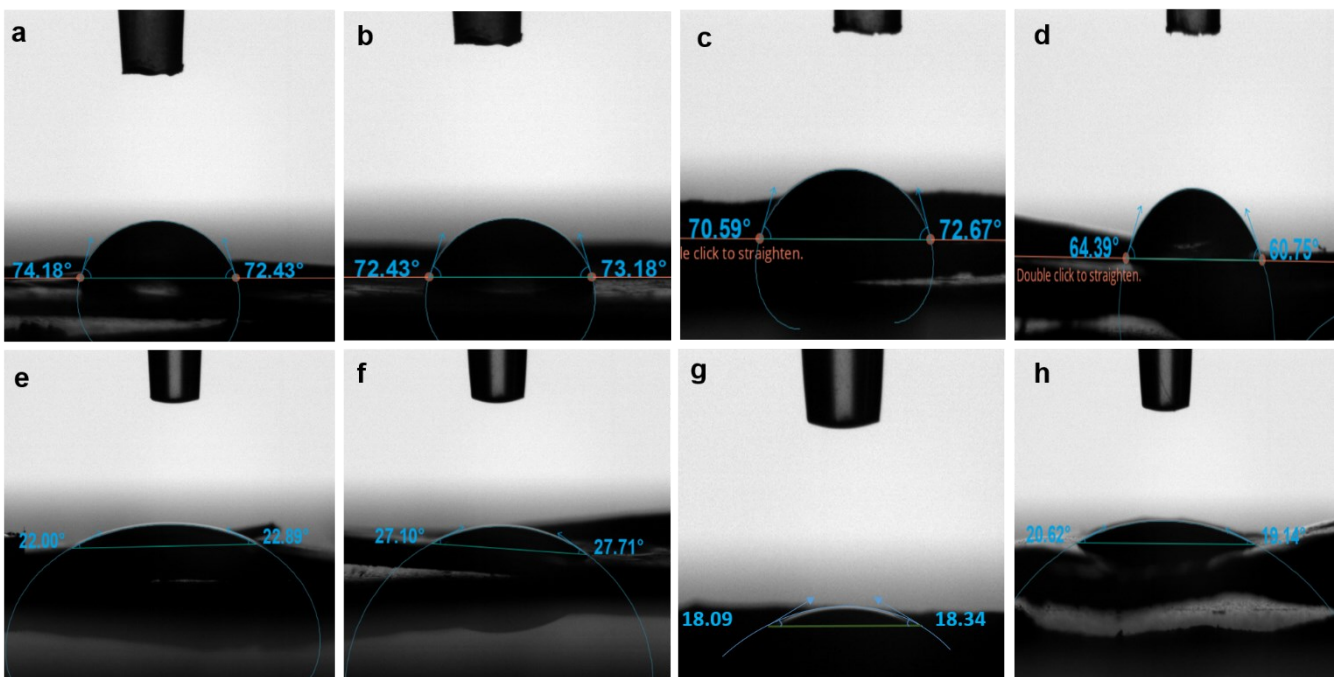

54

55 **Fig. S7** Contact angle images of M1–M4 PVDF membranes: water contact angle (a–d) and Oil contact  
56 angle (e–f).

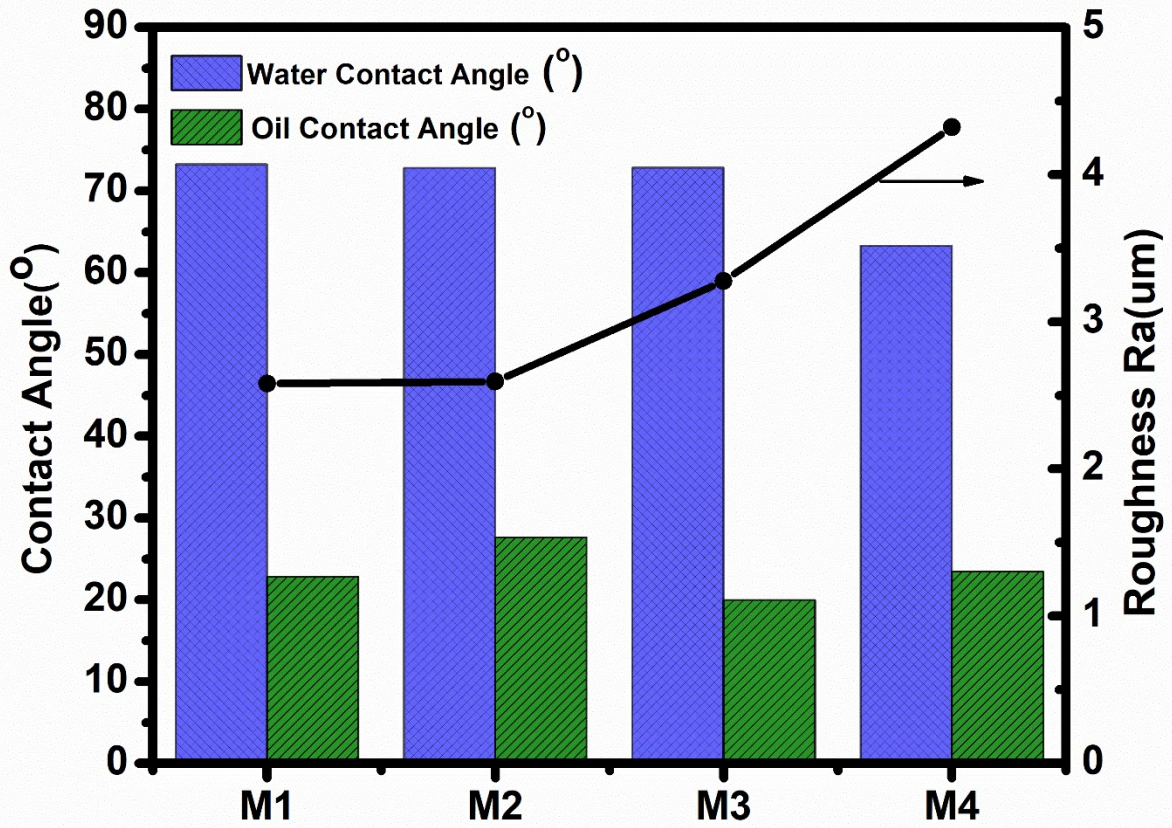

57

58 **Fig. S8** Variation of the water contact angle and its relation with surface roughness Ra.

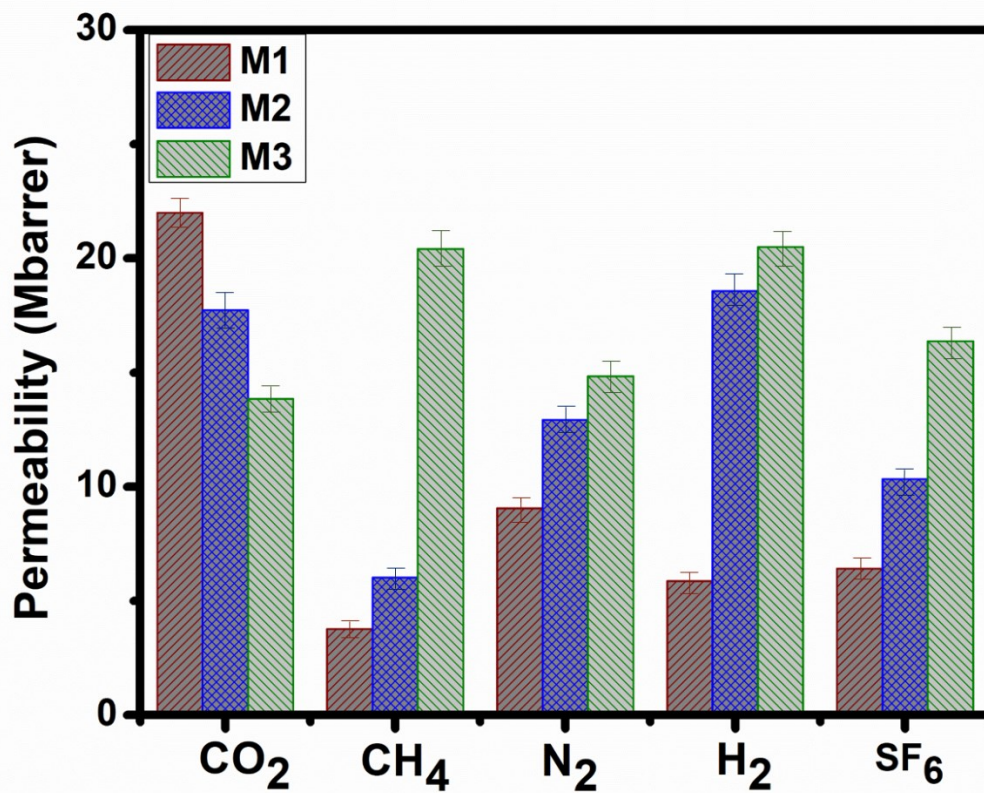

59

60 **Fig. S9** Gas permeability measurements (Mega barrer, Mbarrier) for M1–M3 of 12 wt. % PVDF  
61 membranes prepared with different nonsolvents(s).

62
